# Supplementary material for: Perturbations of glutathione and sphingosine metabolites in Port Wine Birthmark patient-derived induced pluripotent stem cells
Source: PubMed Central journal article supplement — bioRxiv. 2023 Jul 19:2023.07.18.549581. Preprint. [Version 1] doi: 10.1101/2023.07.18.549581 (PMC10370126; doi:10.1101/2023.07.18.549581), 2023-07-19

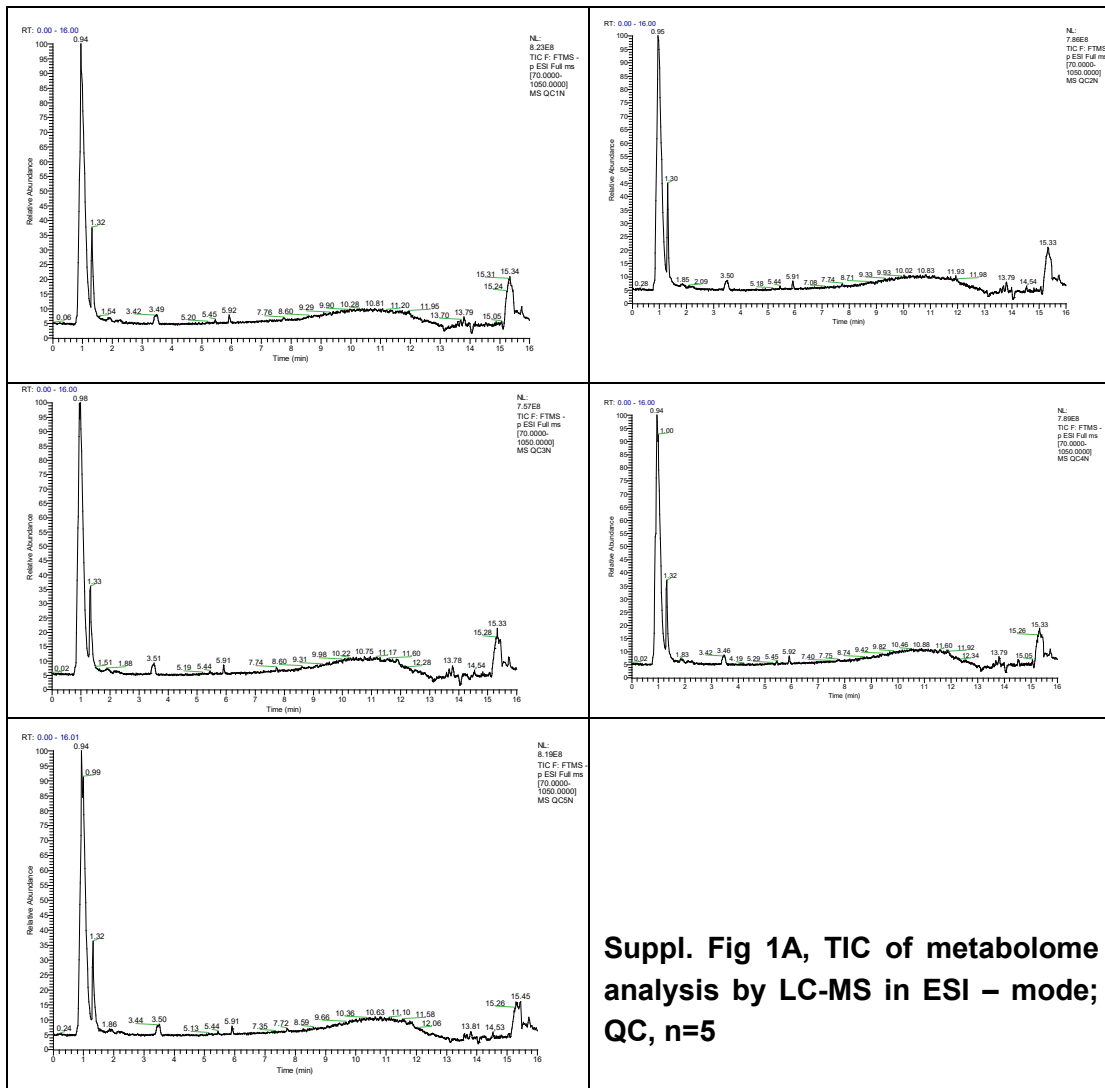

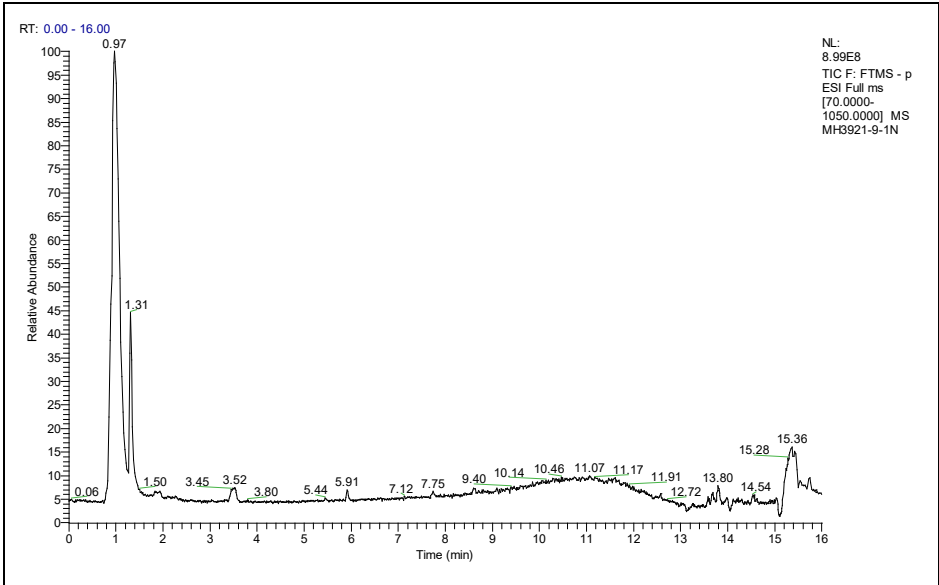

**Suppl. Fig 1 B, TIC for PWB\_3921\_9 in ESI - mode.**

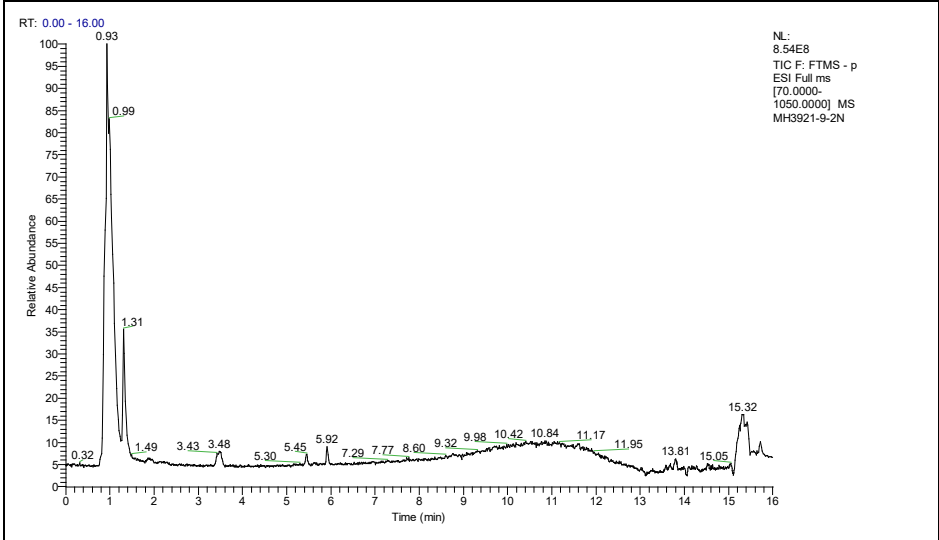

**Suppl. Fig 1 C, TIC for PWB\_3921\_9d in ESI - mode.**

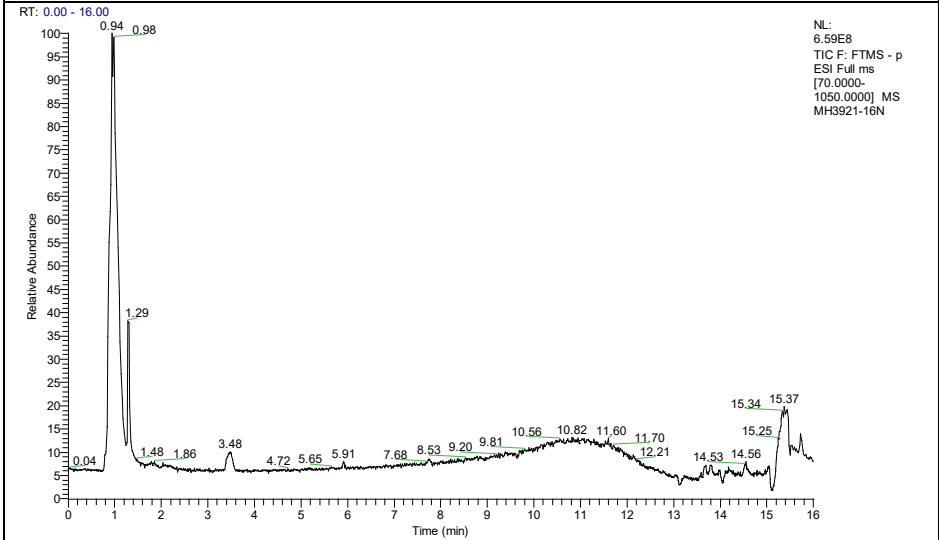

**Suppl. Fig 1 D, TIC for PWB\_3921\_16 in ESI - mode.**

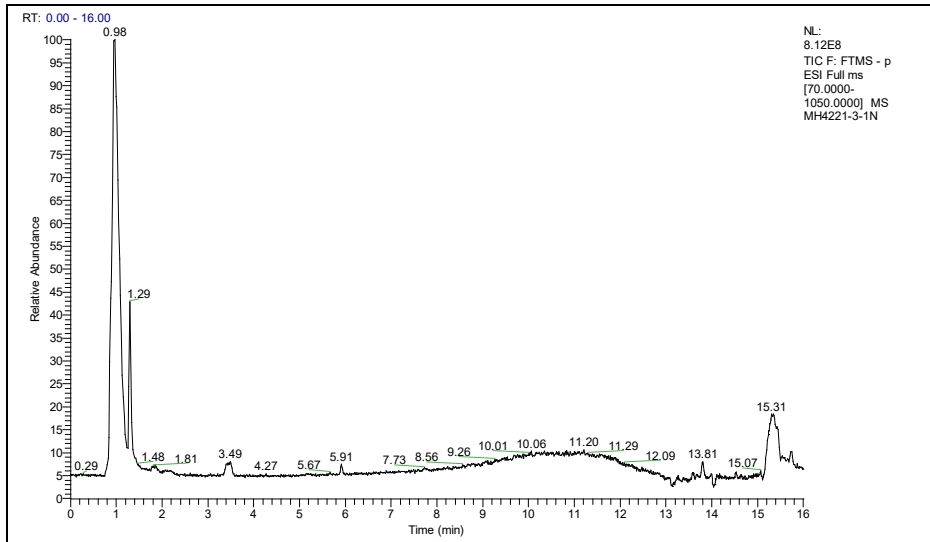

**Suppl. Fig 1 E, TIC for PWB\_4221\_3 in ESI - mode.**

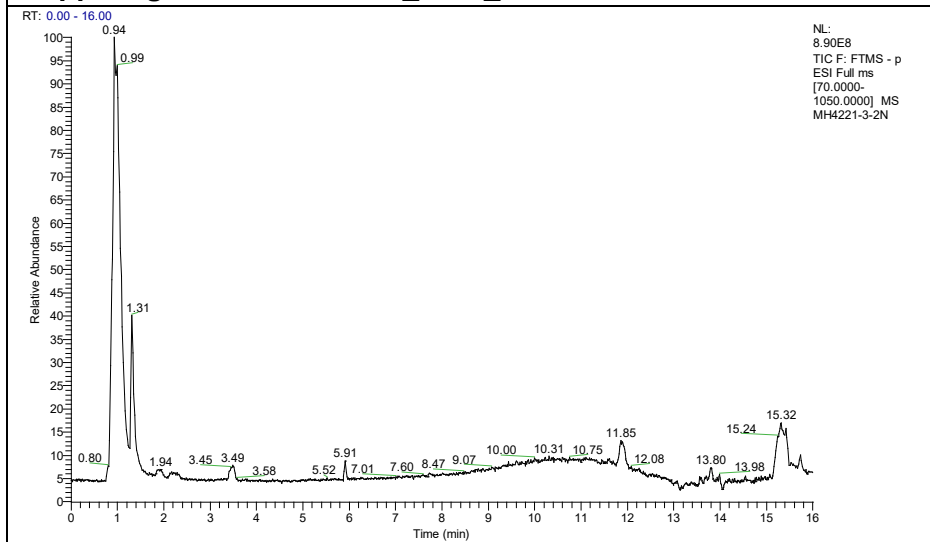

**Suppl. Fig 1 F, TIC for PWB\_4221\_3d in ESI - mode.**

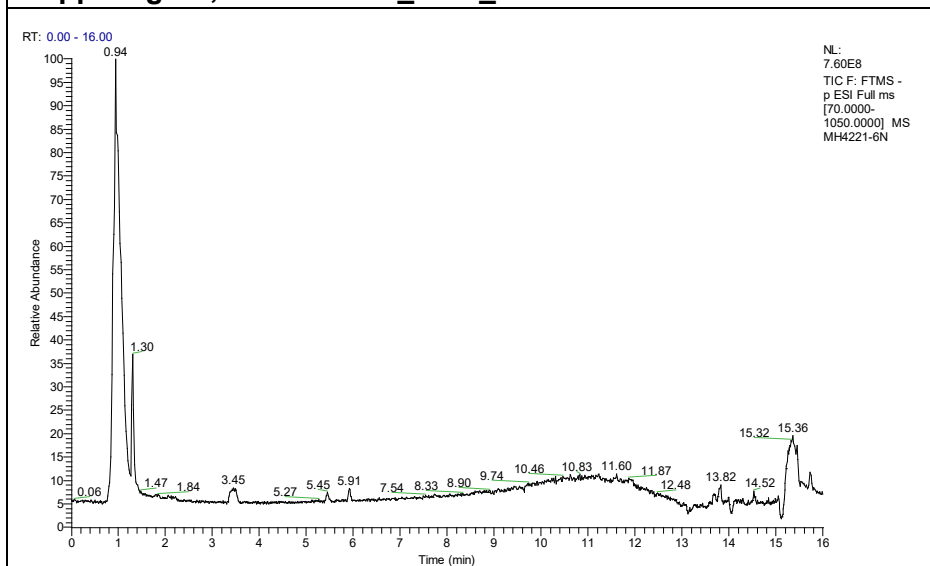

**Suppl. Fig 1 G, TIC for PWB\_4221\_6 in ESI - mode.**

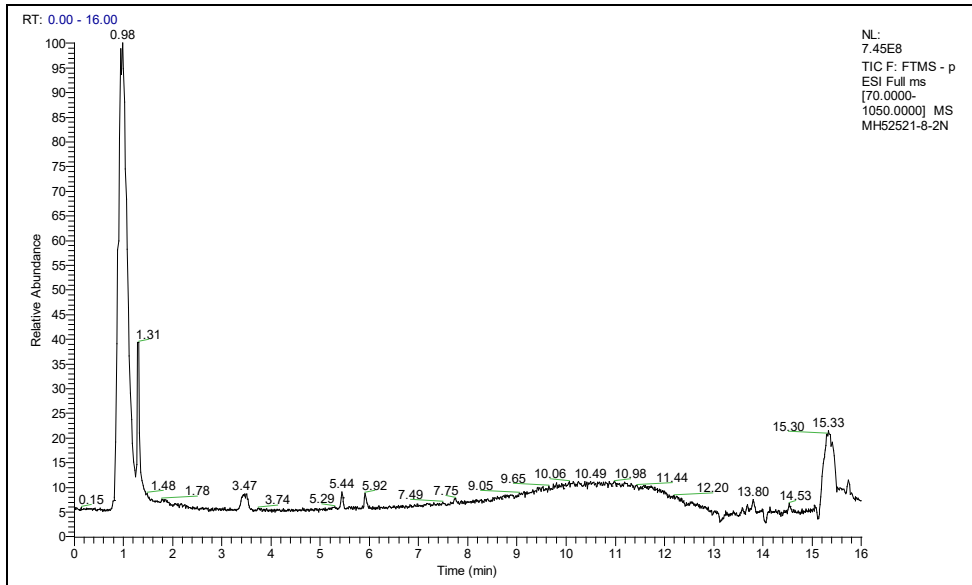

**Suppl. Fig 1 H, TIC for PWB\_52521\_8 in ESI - mode.**

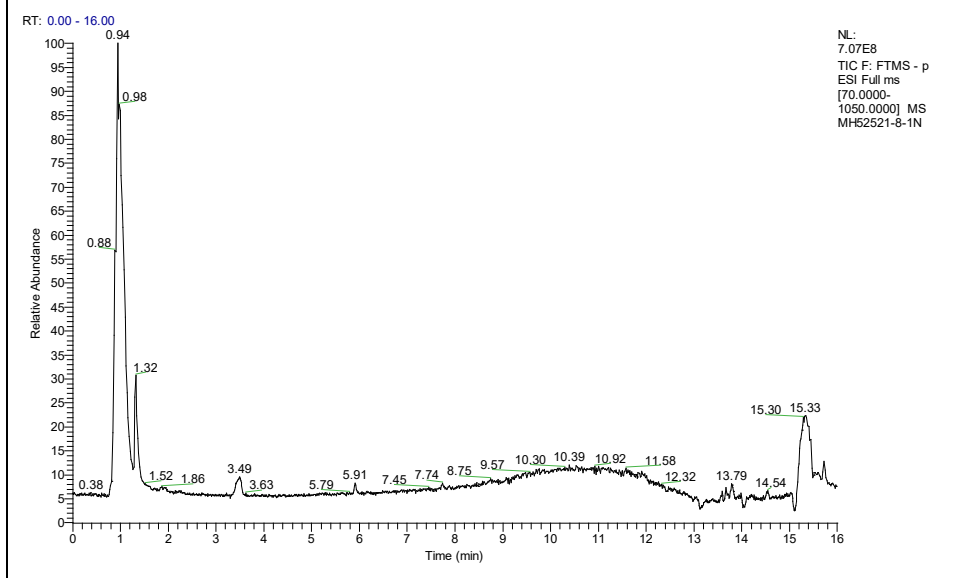

**Suppl. Fig 1 I, TIC for PWB\_52521\_8d in ESI - mode.**

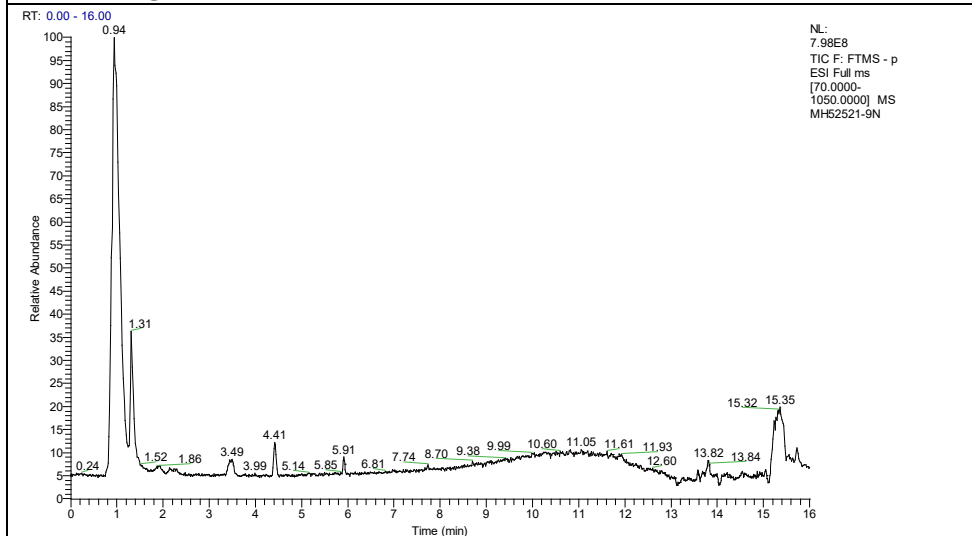

**Suppl. Fig 1 J, TIC for PWB\_52521\_9 in ESI - mode.**

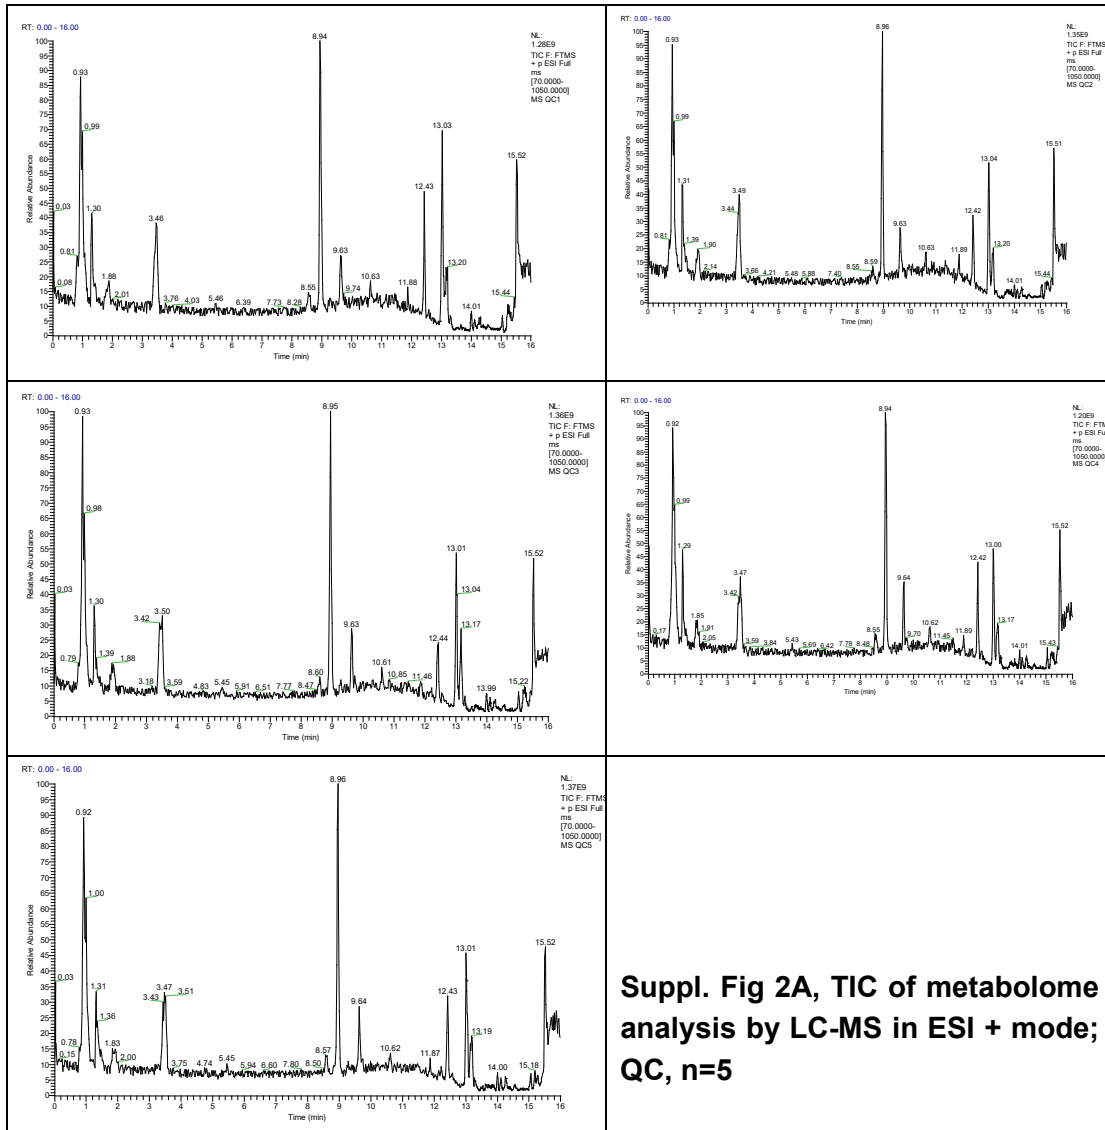

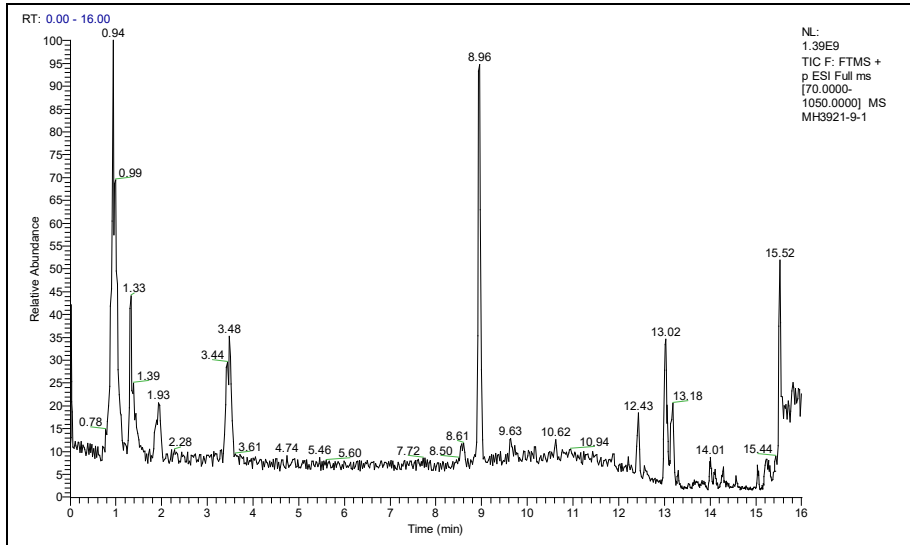

**Suppl. Fig 2 B, TIC for PWB\_3921\_9 in ESI + mode.**

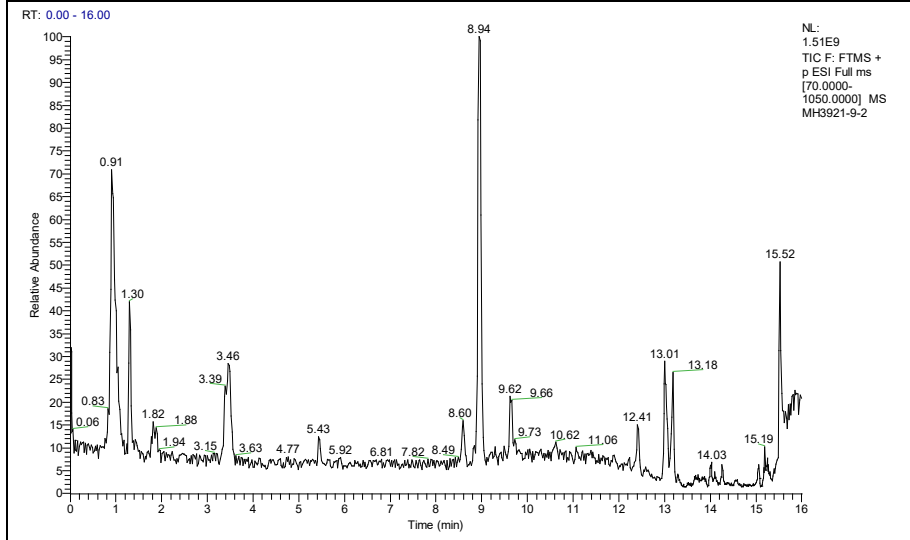

**Suppl. Fig 2 C, TIC for PWB\_3921\_9d in ESI + mode.**

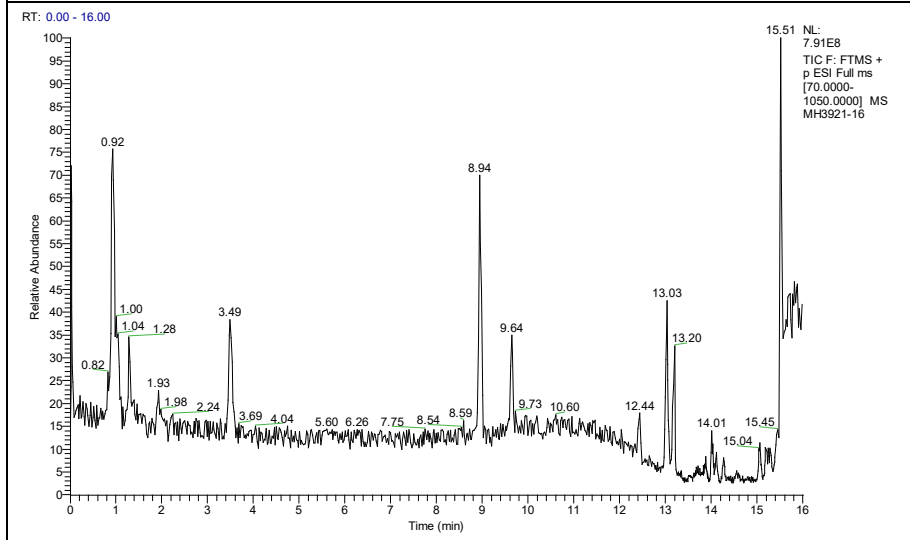

**Suppl. Fig 2 D, TIC for PWB\_3921\_16 in ESI + mode.**

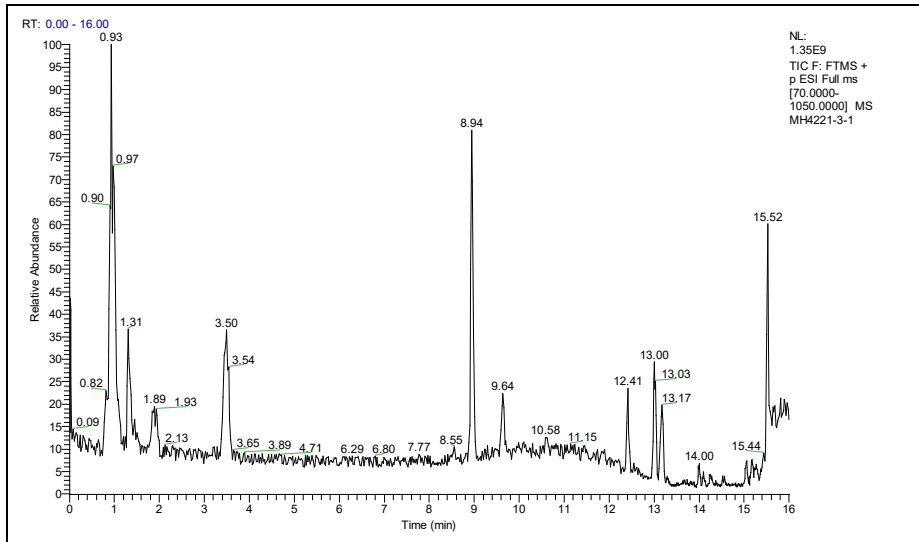

**Suppl. Fig 2 E, TIC for PWB\_4221\_3 in ESI + mode.**

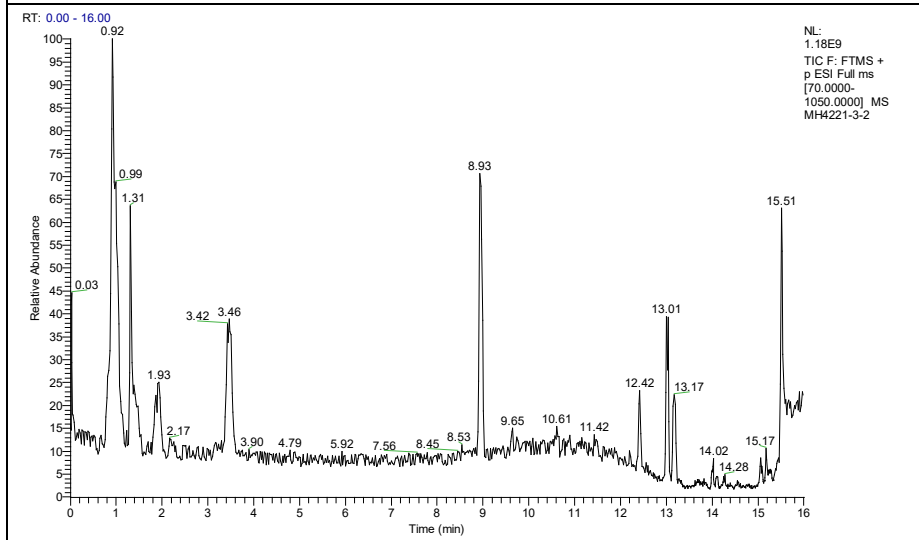

**Suppl. Fig 2 F, TIC for PWB\_4221\_3d in ESI + mode.**

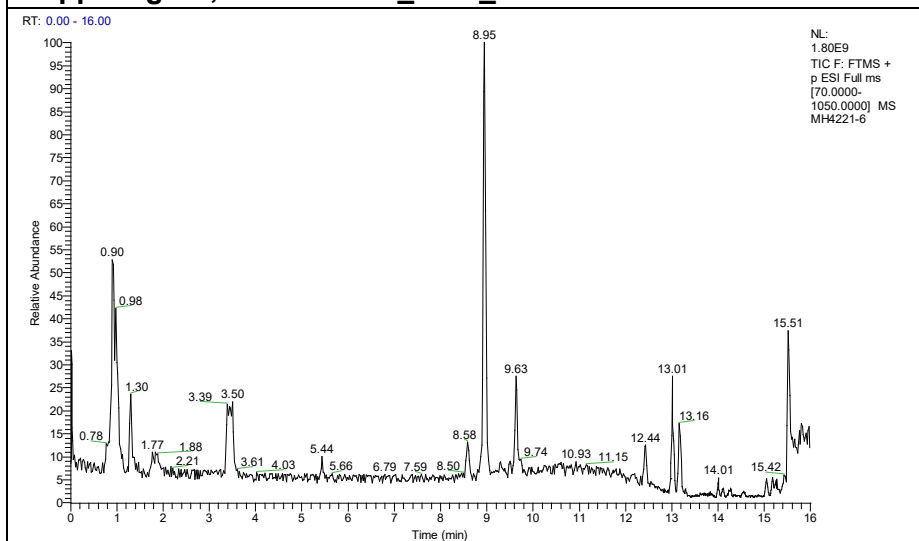

**Suppl. Fig 2 G, TIC for PWB\_4221\_6 in ESI + mode.**

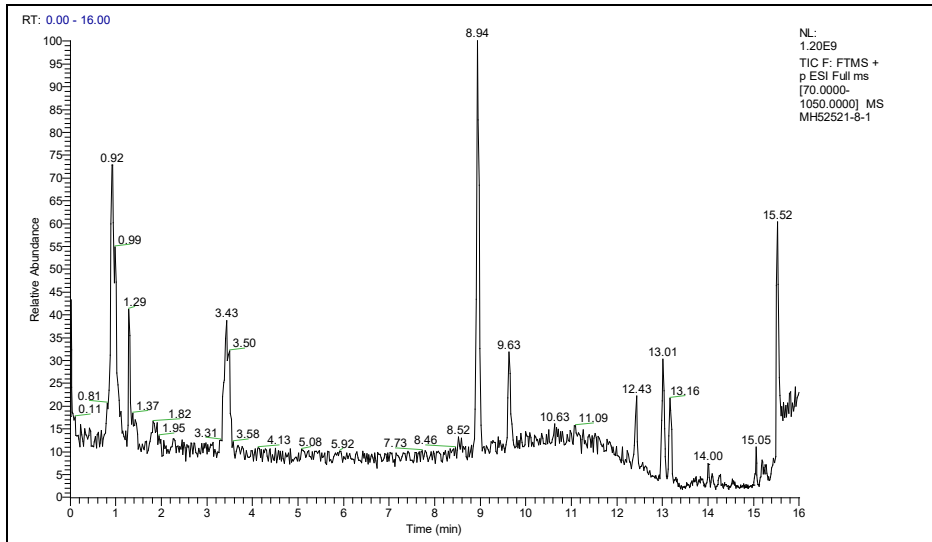

**Suppl. Fig 2 H, TIC for PWB\_52821\_8 in ESI + mode.**

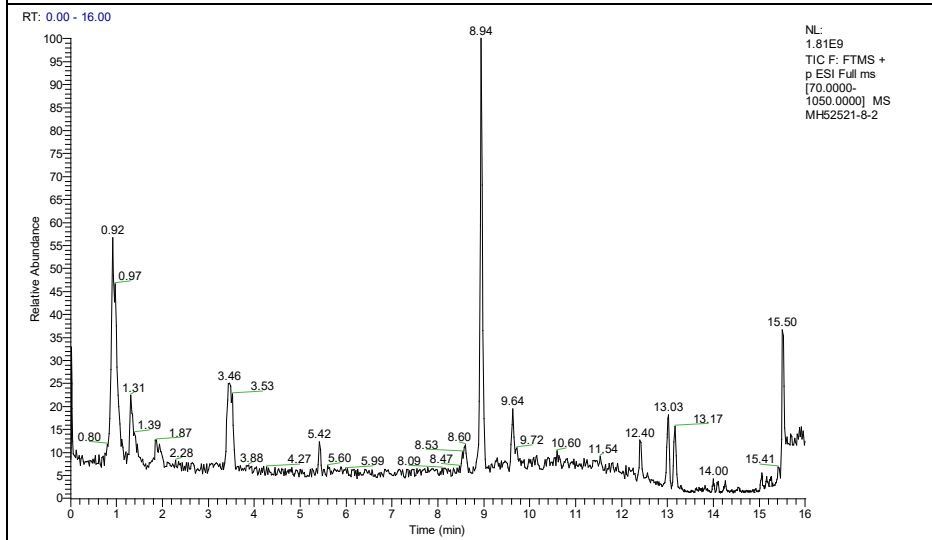

**Suppl. Fig 2 I, TIC for PWB\_52821\_8d in ESI + mode.**

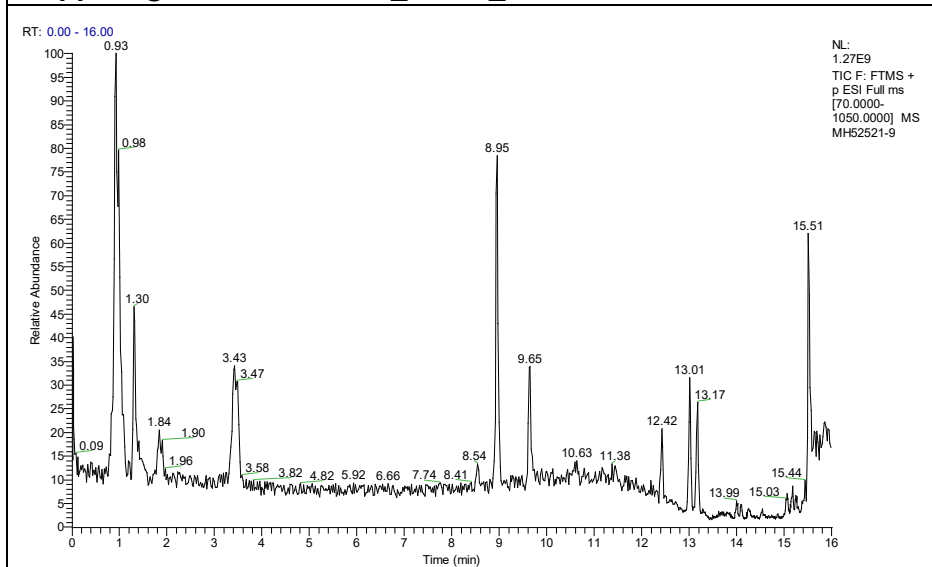

**Suppl. Fig 2 J, TIC for PWB\_52821\_9 in ESI + mode.**



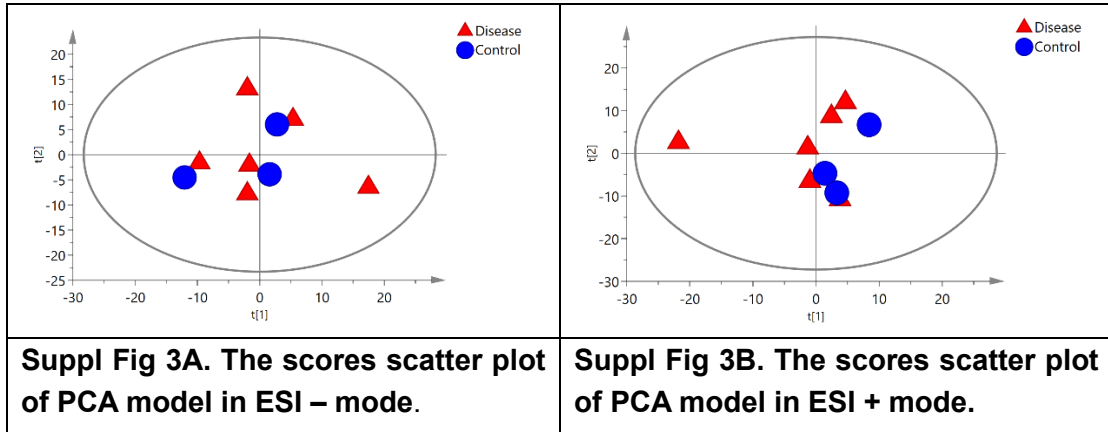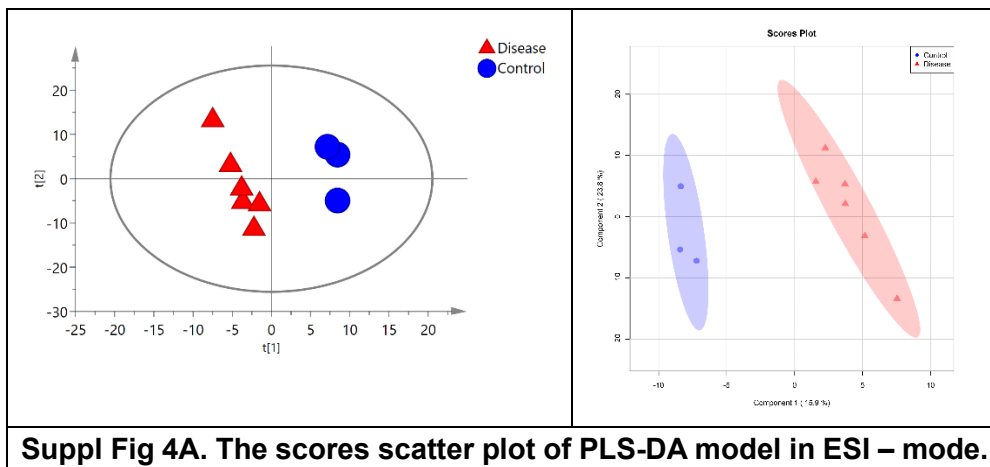

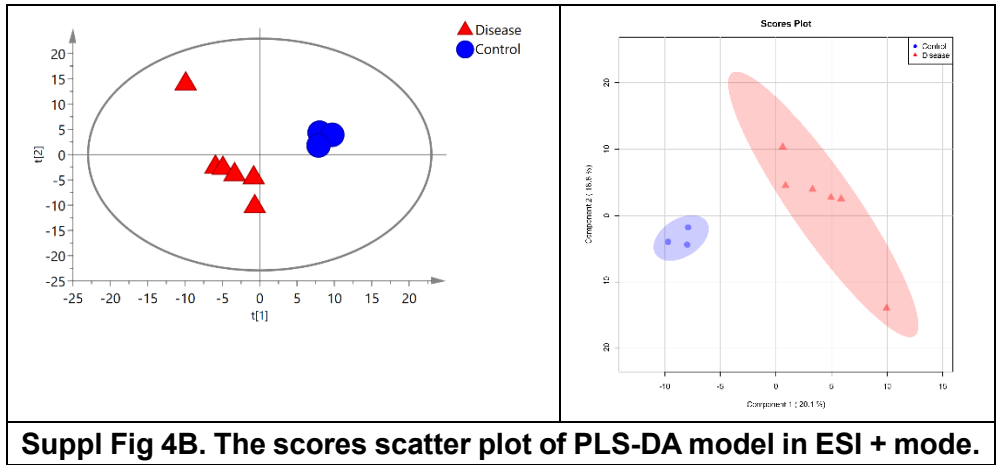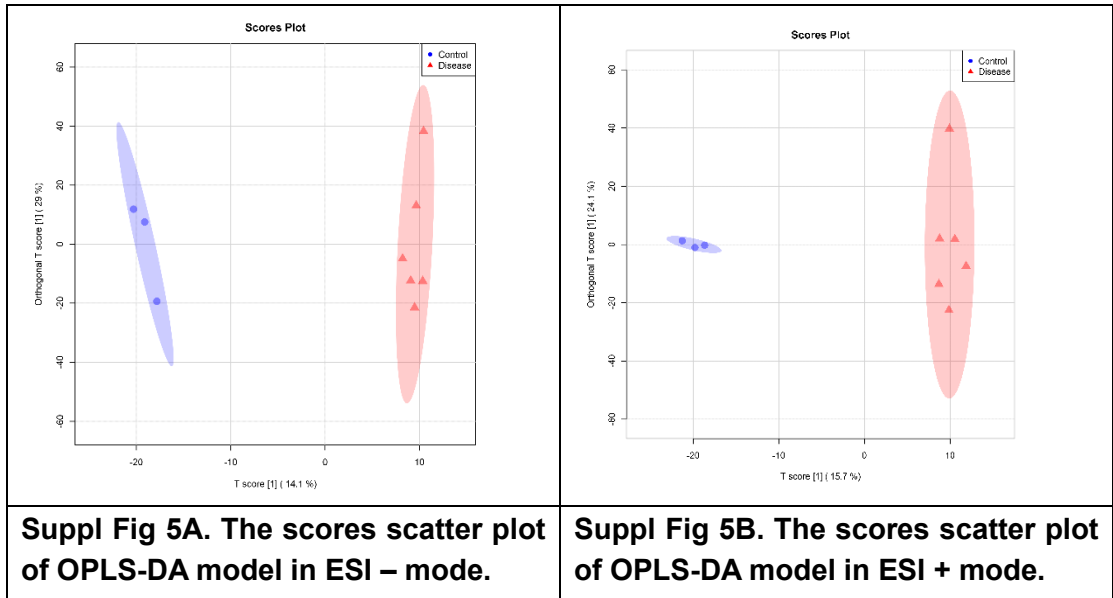

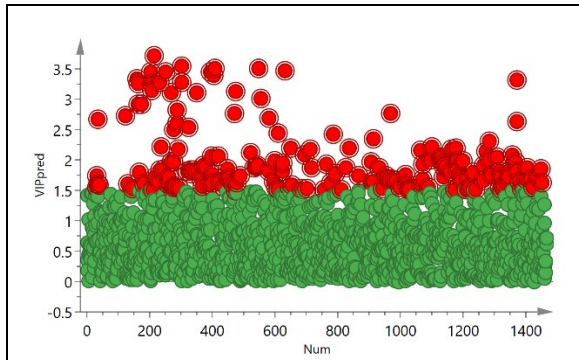

**Suppl Fig 6A. The loading plots of PLS-DA model in ESI - mode. Red box: metabolites with VIP > 1.5.**

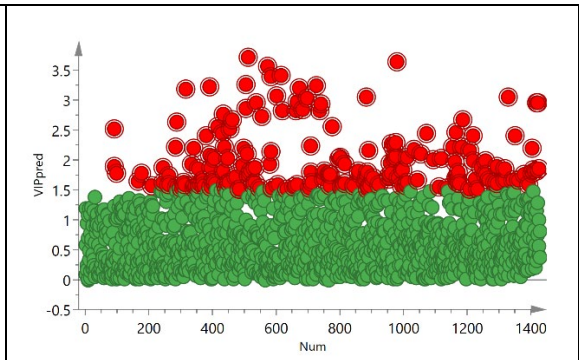

**Suppl Fig 6B. The loading plots of PLS-DA model in ESI + mode. Red box: metabolites with VIP > 1.5.**

**Supplementary Table 1: The profile of the fragments identified in Fig 3**

| Metabolites       | Fragment formula | Fragment m/z | Peak m/z | Error (ppm) | Charge | Neutral charge |
|-------------------|------------------|--------------|----------|-------------|--------|----------------|
| Sphingolipid_ESI+ | C4H9-e           | 57.0699      | 57.0699  | 0.99        | 1      |                |
|                   | C2H6NO-e         | 60.0444      | 60.0445  | 1.81        | 1      |                |
|                   | C5H11-e          | 71.0856      | 71.0850  | -7.34       | 1      |                |
|                   | C4H7NO+H         | 86.0601      | 86.0598  | -3.49       | 1      |                |
|                   | C6H10O-e         | 97.0648      | 97.0645  | -2.37       | 1      | -H             |
|                   | C6H10NO+H        | 114.0914     | 114.0914 | -0.13       | 1      | +H             |
|                   | C17H32N+H        | 252.2686     | 252.2702 | 6.45        | 1      | +H             |
|                   | C18H34N-e        | 264.2686     | 264.2683 | -1.03       | 1      |                |
|                   | C17H34NO+H       | 270.2792     | 270.2769 | -8.25       | 1      | +H             |
|                   | C18H36NO-e       | 282.2792     | 282.2784 | -2.51       | 1      |                |
|                   | C18H37NO2+H      | 300.2897     | 300.2887 | -3.37       | 1      |                |
| Glutathione_ESI+  | C2H4NO2+H        | 76.0393      | 76.0389  | -5.42       | 1      | +H             |
|                   | C4H6NO-e         | 84.0444      | 84.0442  | -1.75       | 1      |                |
|                   | C3H2NO2+H        | 85.0159      | 85.0159  | 0.72        | 1      |                |
|                   | C5H8NO3-e        | 130.0499     | 130.0497 | -0.83       | 1      |                |
|                   | C5H6NO2S-e       | 144.0114     | 144.0114 | 0.11        | 1      |                |
|                   | C5H8NO3S-e       | 162.0220     | 162.0216 | -1.94       | 1      |                |
|                   | C5H9N2O3S+H      | 179.0485     | 179.0477 | -4.09       | 1      | +H             |
|                   | C8H11N2O3S-e     | 215.0485     | 215.0487 | 1.18        | 1      |                |
|                   | C8H13N2O4S-e     | 233.0591     | 233.0577 | -5.89       | 1      |                |
|                   | C9H13N2O4S-e     | 245.0591     | 245.0582 | -3.67       | 1      |                |
|                   | C10H15N2O6S-e    | 291.0646     | 291.0646 | 0.92        | 1      |                |
|                   | C10H17N3O6S+H    | 308.0911     | 308.0895 | -5.09       | 1      |                |
| Glutathione_ESI-  | C2H4NO2-H        | 72.0091      | 72.0090  | -1.47       | 1      |                |
|                   | C2H4NO2+e        | 74.0247      | 74.0249  | 2.70        | 1      |                |
|                   | C3H6NO2-H        | 86.0247      | 86.0248  | 0.84        | 1      | -H             |
|                   | C5H6NO2+e        | 112.0404     | 112.0406 | 1.32        | 1      |                |
|                   | C5H6NO3+e        | 128.0353     | 128.0354 | 0.64        | 1      |                |
|                   | C5H9N2O3-H       | 143.0462     | 143.0464 | 0.93        | 1      | -H             |
|                   | C5H8NO3S-H       | 160.0074     | 160.0074 | 0.14        | 1      | -H             |
|                   | C5H9N2O3S+e      | 177.0339     | 177.0337 | -1.63       | 1      |                |
|                   | C7H10N2O4-H      | 185.0568     | 185.0565 | -1.57       | 1      |                |
|                   | C9H12N3O5+e      | 242.0782     | 242.0788 | 2.20        | 1      |                |
|                   | C10H14N3O5-H     | 254.0782     | 254.0777 | -2.19       | 1      | -H             |
|                   | C10H16N3O6-H     | 272.0888     | 272.0884 | -1.63       | 1      | -H             |
|                   | C10H15N3O5S-H    | 288.0659     | 288.0656 | -0.97       | 1      |                |
| C10H17N3O6S-H     | 306.0765         | 306.0764     | -0.55    | 1           |        |                |

Suppl Fig 7 Original images for IHC. Dashed blue boxed areas were used in the Fig 5 in each panel.

# A. HIF-1 $\alpha$

Control

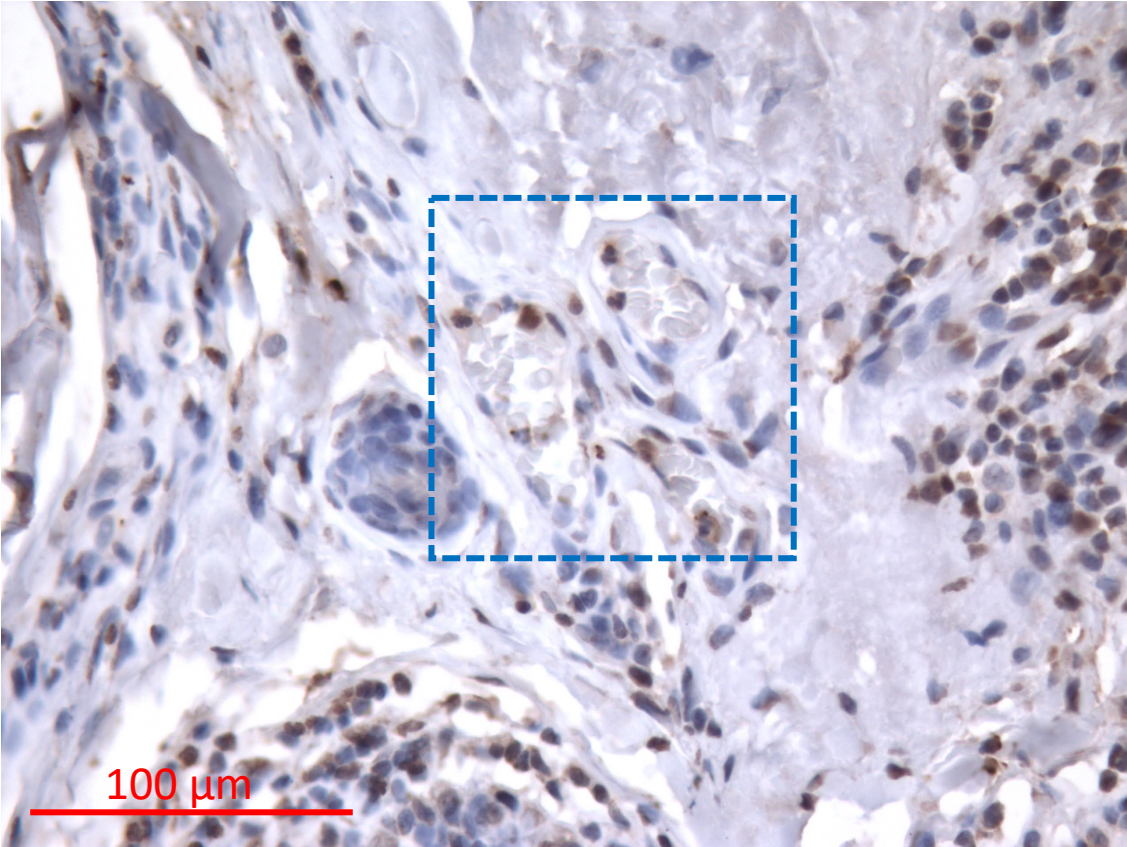

PWB

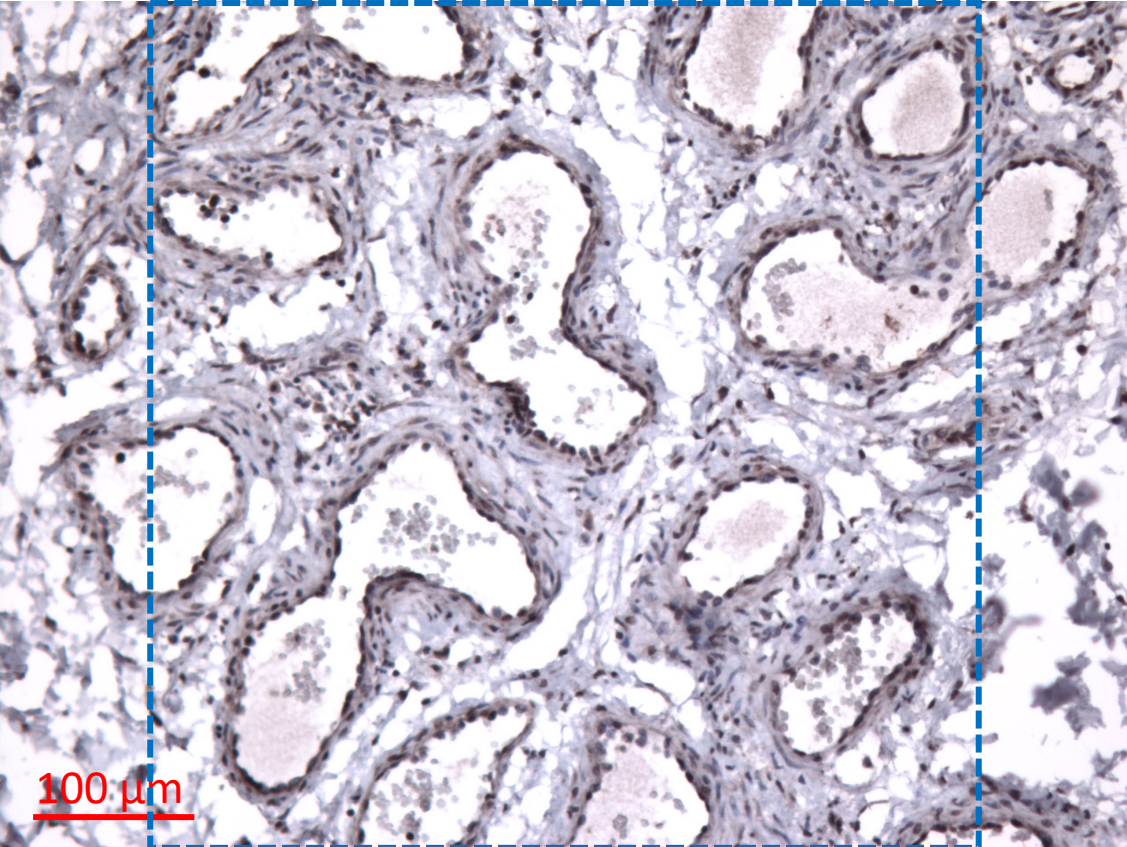

# B. GCLM

Control

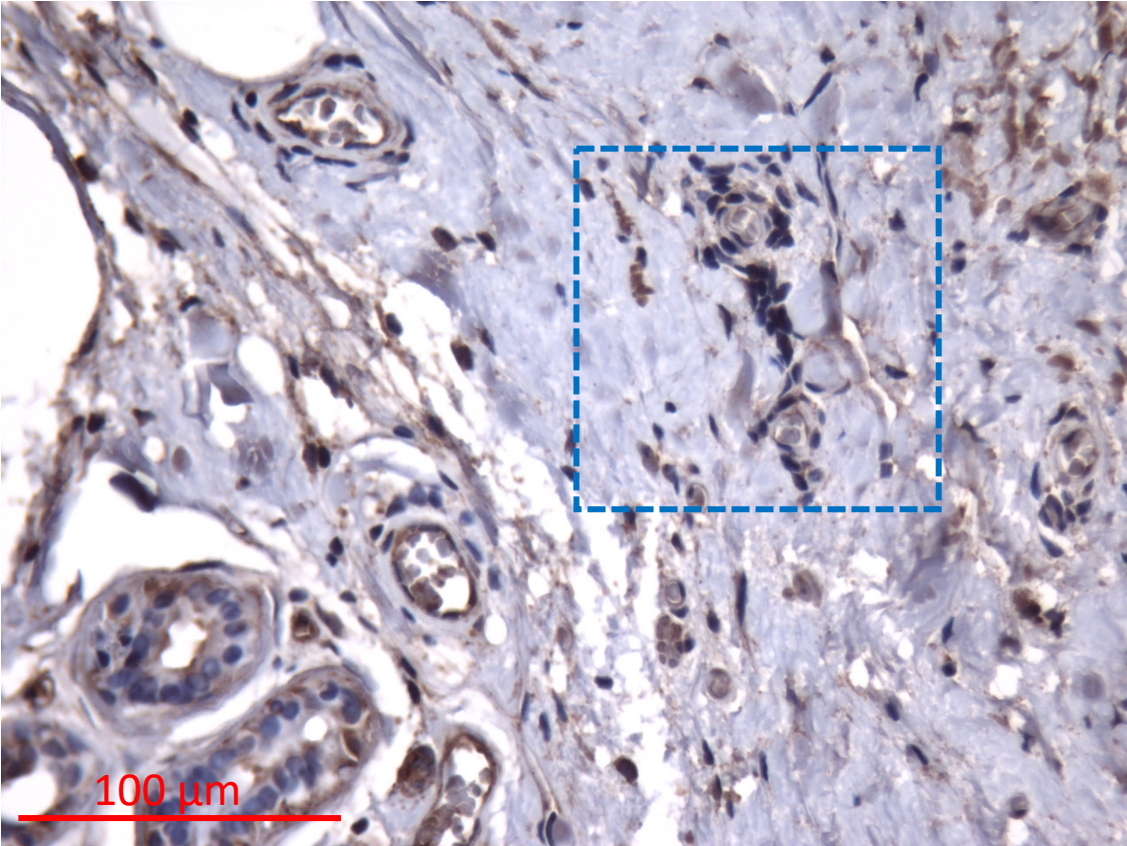

PWB

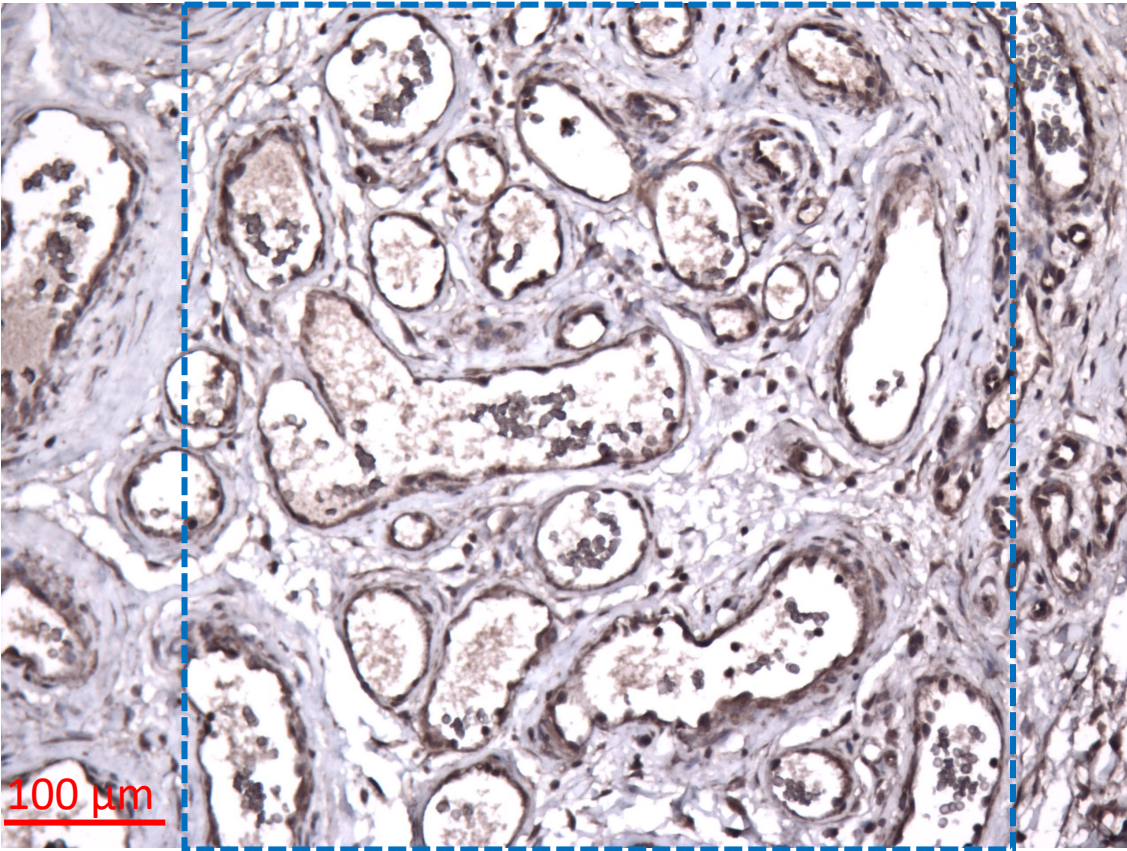

# C. GGT7

Control

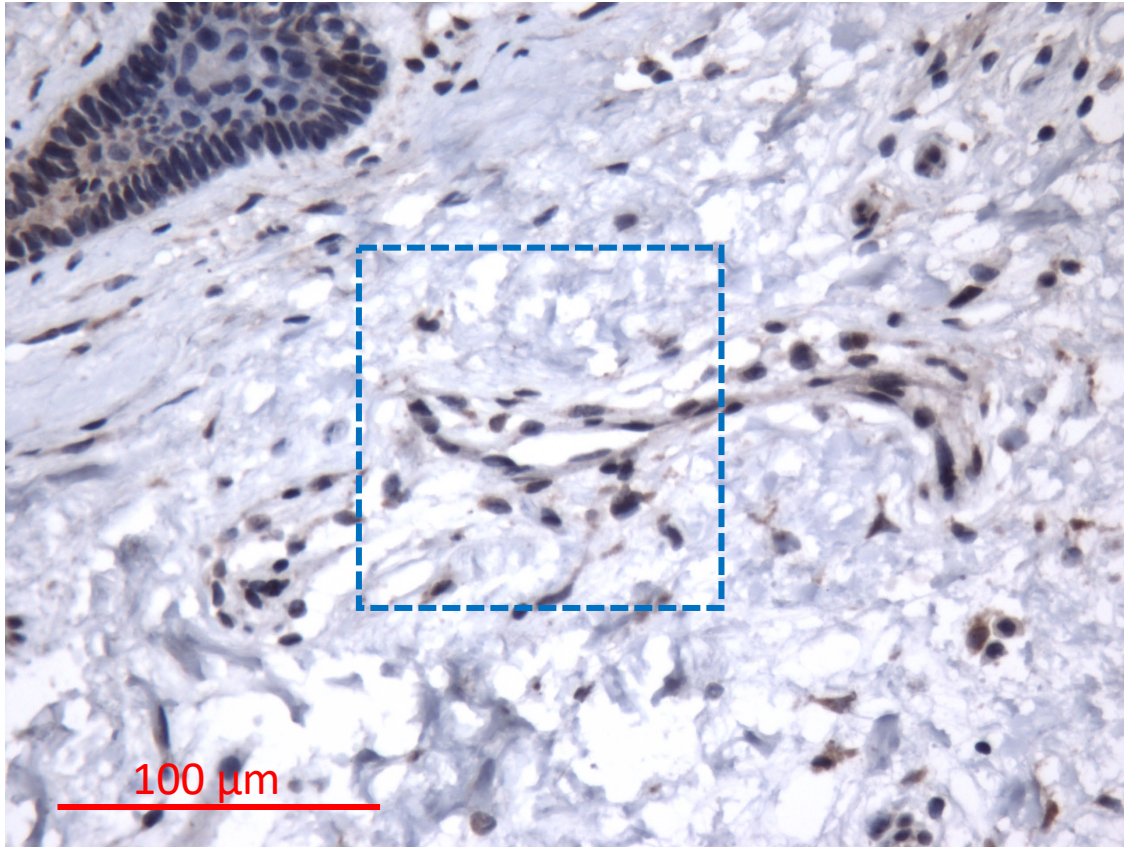

PWB

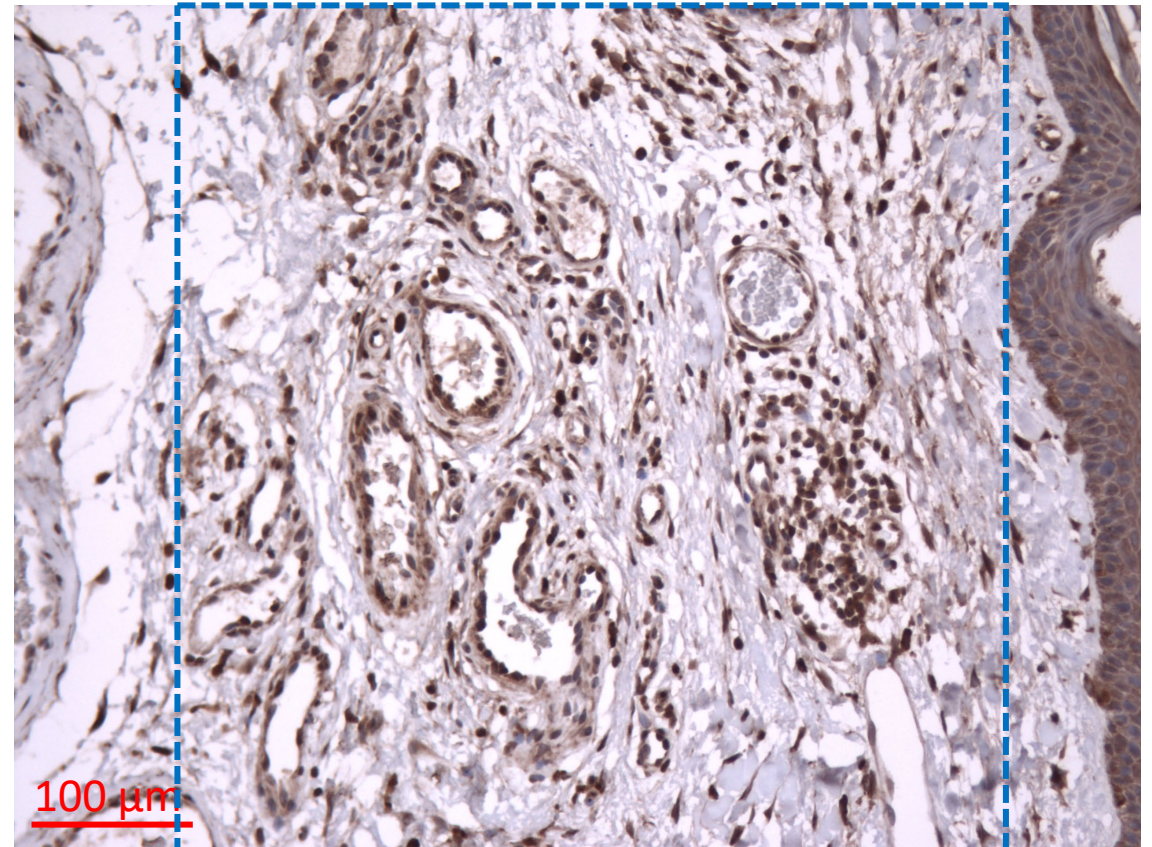

# D. GSTP1

Control

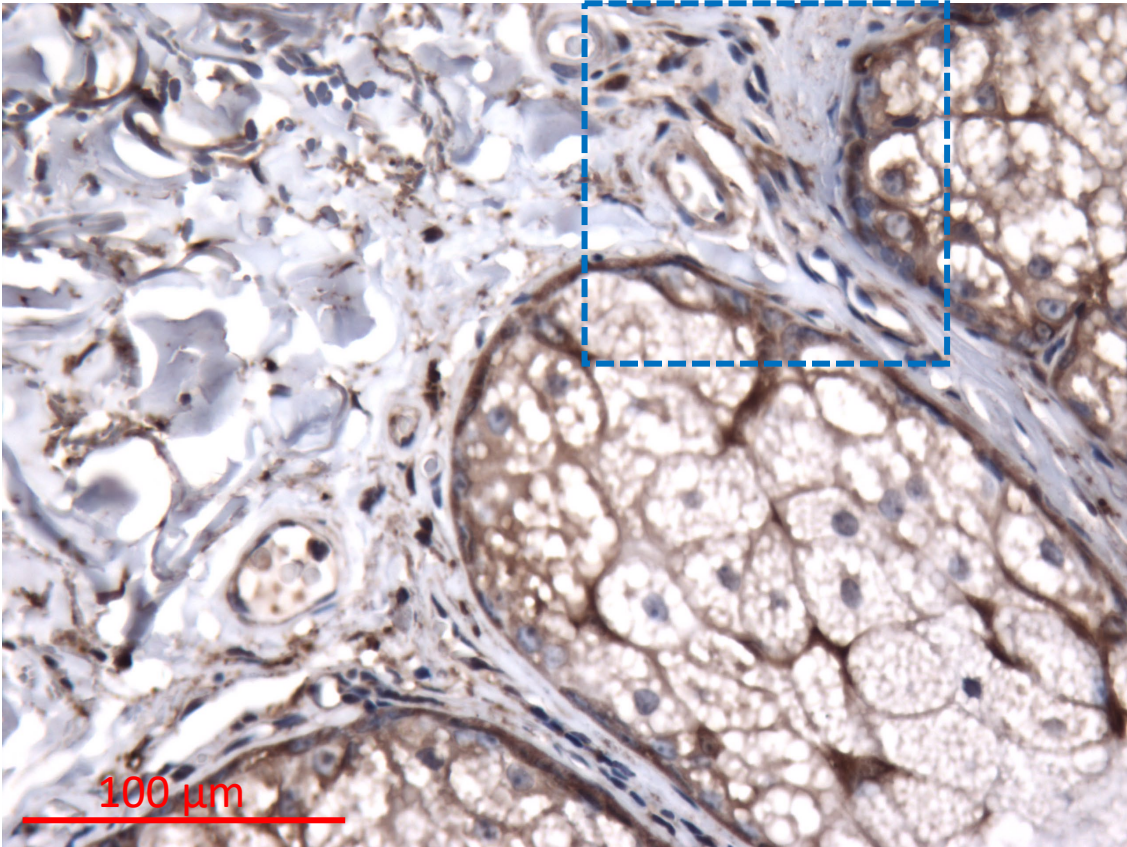

PWB

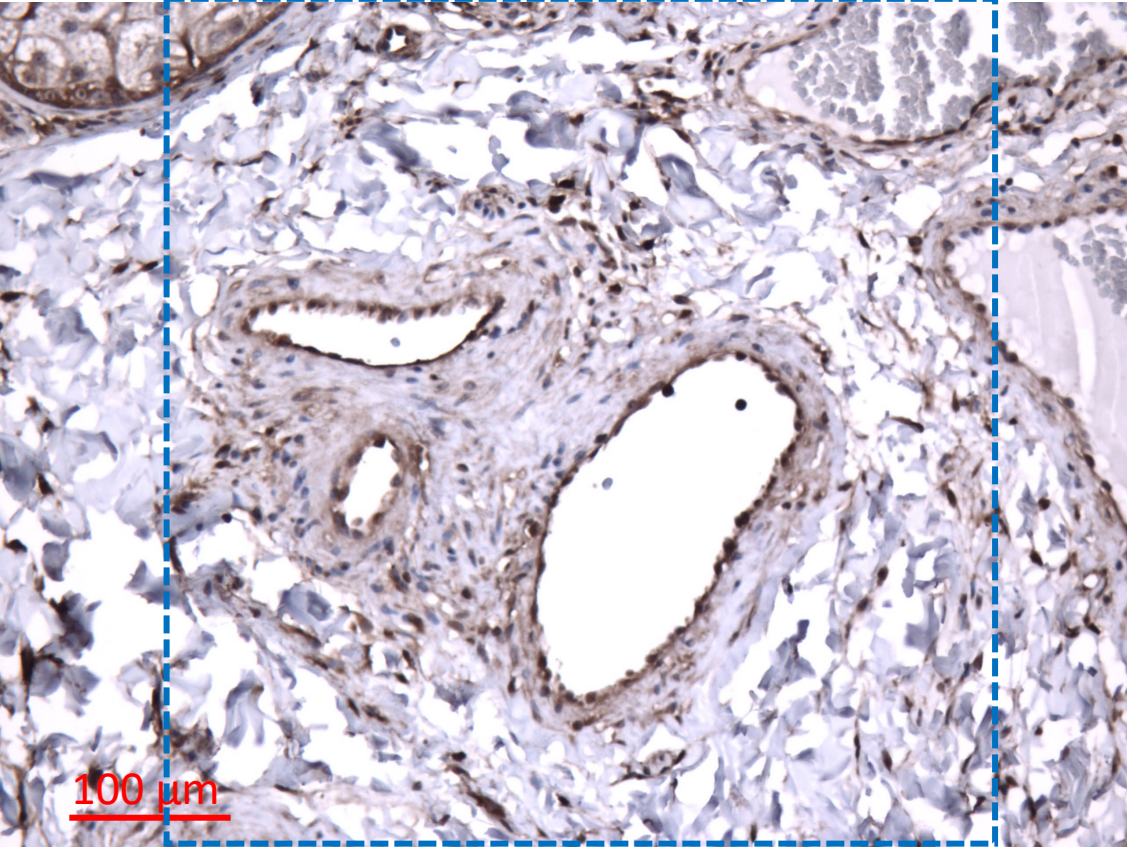

Supplement: media-1.pdf [file media-1.pdf]
